# 1 Bees can be trained to identify SARS-CoV- 2 2 infected samples

## 3 Authors:

4 Evangelos Kontos<sup>1,4\*</sup>, Aria Samimi<sup>1\*</sup>, Renate W. Hakze – van der Honing<sup>2</sup>, Jan Priem<sup>2</sup>, Aurore Avarguès-  
5 Weber<sup>3</sup>, Alexander Haverkamp<sup>4</sup>, Marcel Dicke<sup>4</sup>, Jose L Gonzales<sup>2</sup>, Wim H.M. van der Poel<sup>2,5</sup>.

6 1. InsectSense, Wageningen, The Netherlands

7 2. Wageningen Bioveterinary Research, Lelystad, The Netherlands

8 3. Centre de Recherches sur la Cognition Animale (CRCA), Centre de Biologie Intégrative (CBI),  
9 Université de Toulouse ; CNRS, UPS, 118 Route de Narbonne, 31062 Toulouse, France

10 4. Laboratory of Entomology, Wageningen University, The Netherlands

11 5. Corresponding author, Wageningen Bioveterinary Research, Houtribweg 39, 8221 RA, Lelystad,  
12 Netherlands, E: [wim.vanderpoel@wur.nl](mailto:wim.vanderpoel@wur.nl), T: +31320238383

13 \*These authors contributed equally to this work.

## 14 Abstract

15 The COVID-19 pandemic has illustrated the need for the development of fast and reliable testing  
16 methods for novel, zoonotic, viral diseases in both humans and animals. Pathologies lead to detectable  
17 changes in the Volatile Organic Compound (VOC) profile of animals, which can be monitored, thus  
18 allowing the development of a rapid VOC-based test. In the current study, we successfully trained  
19 honeybees (*Apis mellifera*) to identify SARS-CoV-2 infected minks (*Neovison vison*) thanks to Pavlovian  
20 conditioning protocols. The bees can be quickly conditioned to respond specifically to infected mink's  
21 odours and could therefore be part of a wider SARS-CoV-2 diagnostic system. We tested two different  
22 training protocols to evaluate their performance in terms of learning rate, accuracy and memory  
23 retention. We designed a non-invasive rapid test in which multiple bees are tested in parallel on the  
24 same samples. This provided reliable results regarding a subject's health status. Using the data from  
25 the training experiments, we simulated a diagnostic evaluation trial to predict the potential efficacy  
26 of our diagnostic test, which yielded a diagnostic sensitivity of 92% and specificity of 86%. We suggest  
27 that a honeybee-based diagnostics can offer a reliable and rapid test that provides a readily available,  
28 low-input addition to the currently available testing methods. A honeybee-based diagnostic test might  
29 be particularly relevant for remote and developing communities that lack the resources and  
30 infrastructure required for mainstream testing methods.

## 31 Key words

32 Honeybees, Olfaction, SARS-CoV2, Covid-19, Conditioning, Detection

## 33 Introduction

34 Infections and other pathologies lead to physiological changes in the bodies of animals (Trabue *et al.*,  
35 2010) and humans (Buljubasic & Buchbauer, 2015; Sethi *et al.*, 2013; Shirasu & Touhara, 2011, Probert  
36 *et al.*, 2009). Consequently, the emitted volatile organic compounds (VOCs) differ between healthy  
37 and infected individuals (Fitzgerald *et al.*, 2017; Wilson *et al.*, 2018; Olsson *et al.*, 2014; Trabue *et al.*,  
38 2010; Probert *et al.*, 2009). VOCs constitute an odour fingerprint depending on age, sex, diet, genetic  
39 background, and metabolic conditions, thus making this odour fingerprint unique for every individual  
40 (Buljubasic & Buchbauer, 2015; Shirasu & Touhara, 2011). Analysing that fingerprint can provide  
41 relevant information about the state of the individual's health. VOC analysis has been consequently  
42 used for disease diagnostics, mostly in the form of breath and faeces analysis in both humans and  
43 animals (Fitzgerald *et al.*, 2017; Wilson *et al.*, 2018; Olsson *et al.*, 2014; Trabue *et al.*, 2010; Probert *et*  
44 *al.*, 2009).

45 The current COVID-19 pandemic has clearly shown the need for both the rapid development of  
46 diagnostic tests and the rapid delivery of reliable results (European Centre for Disease Prevention and  
47 Control, 09/2020). Fast and reliable diagnostic tests are required to effectively implement control  
48 measures such as quarantine of infected people or animals (Wells *et al.*, 2021). There is a global need  
49 for reliable and rapid testing, which has led to the development of very reliable PCR tests and rapid  
50 SARS-CoV-2 tests such as the RNA RT-LAMP (Fowler *et al.*, 2021) and antigen tests (Krüttgen *et al.*,  
51 2021). However, in developing countries and remote areas such methods may not be easily available.  
52 Dogs have been successfully trained to discriminate between SARS-CoV-2-infected and non-infected  
53 individuals with a diagnostic sensitivity ranging from 65% to 82.6% and specificity of 89% and 96.4%  
54 respectively (Eskandari *et al.*, 2021; Jendryn *et al.*, 2020). Similar to dogs, some insects have keen  
55 olfactory capabilities. For example, fruit flies (*Drosophila melanogaster*) can detect cancer in humans  
56 (Strauch *et al.*, 2014), while honeybees (*Apis mellifera*) have exhibited the ability to detect some

57 human diseases, such as tuberculosis (Suckling & Sagar, 2011). Honeybees can, therefore, be a  
58 potential alternative to dogs for the detection of COVID-19 with the benefit of being readily available  
59 and having low costs of maintenance.

60 Pavlovian conditioning was first applied to dogs (Pavlov, 1927) and later to honeybees (Takeda, 1961).  
61 Bees possess the reflex to extend their proboscis when detecting a sugar solution (PER; proboscis  
62 extension reflex) and they can be conditioned to exhibit a PER when exposed to specific odours.  
63 Takeda's (1961) classical conditioning pairs a conditioning stimulus (CS), such as an odour, with an  
64 unconditioned stimulus (US), the food reward, which in most cases is a sugar water solution  
65 (Matsumoto *et al.*, 2012, Sutherland *et al.*, 2010, Wright *et al.*, 2010). After such training the bees  
66 exhibit PER when exposed to the CS, without the presence of sugar water.

67 Previous studies have shown that animals can detect differences between VOCs emitted by healthy  
68 or SARS-CoV-2 infected individual animals or humans (Eskandari *et al.*, 2021; Jendryn *et al.*, 2020;  
69 Suckling & Sagar, 2011). The objective of this study was to assess the potential of training bees for the  
70 detection of SARS-CoV2-infected animal samples. We assessed two different training methods and  
71 show that bees can be effectively trained to detect differences in odours between samples collected  
72 from SARS-CoV2 infected and uninfected minks (*Neovison vison*), highlighting the potential of a  
73 honeybee-based diagnostic test for the detection of diseases.

## 74 Materials and Methods

### 75 Honeybees' preparation

76 At the start of each experimental day during April and May 2021, we collected a new batch of  
77 honeybees (*Apis mellifera*) from the same beehive, located 2 km away from the Wageningen  
78 Bioveterinary Research (WBVR) laboratory in Lelystad, the Netherlands. We assumed that the bees  
79 were a mixture of different working classes. Foragers were preferred but the weather conditions did  
80 not allow for flights every day so discrimination between worker classes was not always possible. The

81 bees were collected with a brush from inside the hive or by collecting departing bees at the hive  
82 entrance, using the same brush. For transport to the laboratory, bees were placed in transparent  
83 cylindrical plastic containers (100 ml), that carried 5-15 bees each. A total of 149 bees were used  
84 during the experiments.

85 The containers with honeybee workers were placed in a freezer (-20°C) for 3-5 min until the bees  
86 become inactive, which makes harnessing safer. Once out of the freezer, the bees were placed on a  
87 paper towel and they were inserted inside our custom-made “bee-holders” with the help of tweezers  
88 (Fig. 1). The bee-holders are made of plastic and have the following dimensions: 20 × 10 × 10 mm.  
89 They consist of two parts, the back and base which allows the experimenter to hold it easily and the  
90 front part, the chamber, where the bee is kept. The chamber has two openings, one in the bottom to  
91 allow for the bee to be inserted easily and a door-like structure above. The door closes once the bee  
92 is inside the chamber locking its head into position, while allowing the rest of the body to move freely.  
93 The chamber also has two openings for the bee’s wings, avoiding unnecessary injuries. We harnessed  
94 the bees 30 min after collection and the experiments started 3 h after harnessing. We collected and  
95 harnessed multiple bees in parallel. Those that exhibited a Proboscis Extension Reaction (PER) after a  
96 brief touch of the antenna with the sugar-water solution (Fig. 1), were used for conditioning.

## 97 [Sample selection](#)

98 Throat swabs were taken of necropsied animals from a mink farm during the SARS-CoV2 epidemic in  
99 the period of April-November 2020, in the Netherlands. 2 ml of Dulbecco’s Modified Eagle Medium  
100 (DMEM), supplemented with 10% Fetal Calf Serum (FCS) and 1% Antibiotic Antimycotic (Gibco,  
101 Thermofisher, Netherlands) was added to each swab sample. The presence of viral SARS-CoV-2 RNA  
102 as well as the Cycle Threshold (Ct) value of the samples were determined by real time RT-PCR on the  
103 SARS-CoV-2 E gene (Corman *et al.*, 2020). All minks were fed the same feed ration and were raised  
104 under the same conditions in the same location in a production farm in the South of the Netherlands  
105 (Oreshkova *et al.*, 2020). The swab solutions (60 µl of liquid) from SARS-CoV-2 infected and healthy

106 minks were absorbed by filter papers (Whatman, Cat No 1001090) (1 × 3 cm size), which were placed  
107 inside identical syringes (20 ml) and the plastic containers.

## 108 Olfactory conditioning procedures

109 We tested two different bee training protocols inspired by earlier research reported by Sutherland *et*  
110 *al.* (2010) (Protocol 1) and Wright *et al.* (2010) (Protocol 2).

111 All experiments were executed in a biosafety level 2+ laboratory at WBVR, in Lelystad, the  
112 Netherlands. The bee conditioning and retention test took place inside a biosafety cabinet. The bees  
113 were introduced inside the biosafety cabinet after being harnessed and remained inside until the end  
114 of the experiment. The airflow inside the hood was 0.36 m/s, the temperature 21 °C and the humidity  
115 56%; these conditions were regulated throughout the experiment. A trial lasted 40 seconds during  
116 which the bee was placed in front of the odour delivery apparatus. The syringes released an air puff  
117 after the first 20 s, that lasted for 5 s, during which we recorded the bee's reaction. The bee would  
118 stay there for 15 s and would then be replaced by the next bee in line. The ITI (Intertrial Interval) was  
119 10 min in both protocols.

## 120 Unconditioned stimuli

121 We used two different protocols, in both of which, a wooden stick was soaked with sugar water (US)  
122 (Fig. 1), first touching the bee's antennae, to induce PER, and later the proboscis. If the proboscis was  
123 already extended, the antennae were not touched. The sugar water reward occurred for 5 s with a 2  
124 s overlap with the air puff from the syringe, which preceded it. The US used during protocol 1 was 1.5  
125 M sugar-water solution (Sutherland *et al.*, 2010). In protocol 2 we used two US types. The positive  
126 unconditioned stimulus (US+) was a 1 M sugar-water solution. During protocol 2, we also exposed the  
127 bees to a quinine-sugar-water solution, an aversive stimulus, the negative US (US-; 300 mM sugar, 10  
128 mM quinine; Wright *et al.*, 2010). When the bees were exposed to samples from healthy mink  
129 individuals, the sugar-soaked stick first touched the antennae to induce PER, and then the quinine-

130 sugar-soaked stick would touch the proboscis. If the proboscis was already extended the antennae  
131 were not touched.

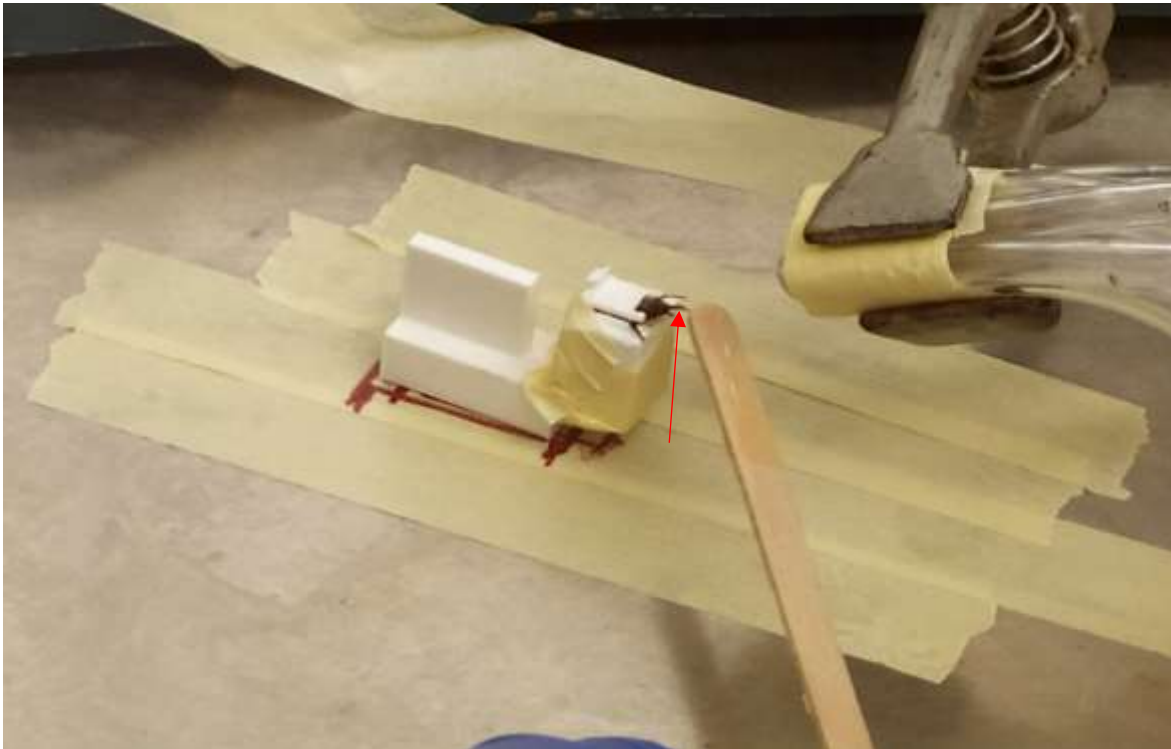

132

133 **Figure 1. Picture of the conditioning procedure during protocol 1.** A single honeybee  
134 harnessed inside our custom-made bee-holder. The bee has just been exposed to a positive  
135 sample and been provided with a wooden stick soaked in sugar water, which has led her to  
136 express the Proboscis Extension Reflex (PER). The red arrow indicates the bee's proboscis.

#### 137 Protocol 1

138 In this training procedure we used one sample from an infected (positive), and one from a healthy  
139 (negative) animal to condition 56 honeybees. The bees were trained with the same positive sample,  
140 each experimental day, for which a standardized cycle threshold (Ct) value of 21 was acquired from a  
141 PCR test. The filter paper soaked with the negative sample was placed inside a small plastic container  
142 connected to two tubes. One tube was connected to a pump, providing a constant air flow (40 ml/min)  
143 while the other tube was placed in front of the bees, thus delivering the healthy sample odour  
144 constantly during the training trials. The syringe containing the infected sample was connected with a

145 similar tube. The air flow necessary to deliver the infected sample odour to the bees was provided by  
146 manually operating the syringe. The tubes from the plastic container (healthy sample) and the syringe  
147 (infected sample) were taped together, so that the bee could be exposed to both simultaneously  
148 during the CS delivery time. There was a distance of 2 cm between the bees and the tube outlets and  
149 the syringe released an air puff of 15 ml in 5 s.

150 We performed: i) seven conditioning trials in which the bees were exposed to the positive infected  
151 sample against the background of the healthy negative sample and were provided with a sugar-water  
152 solution as unconditioned stimulus (US); and ii) 7 trials in which the bees were only exposed to the  
153 healthy sample and no US. The trials followed a pseudorandomized order (H-I-H-I-I-H-I-H-H-I-I-H-H-I)  
154 (H: Healthy, I: Infected) (Matsumoto *et al.*, 2012). During conditioning we recorded the number of  
155 bees that expressed PER during each of the seven training rounds, before exposure to US, to assess  
156 the rate with which they learned (learning curve).

## 157 Protocol 2

158 In this training procedure we used three samples from infected animals (positive) and three samples  
159 from healthy ones (negative) to condition 92 honeybees. The bees were trained with positive samples  
160 for which a standardized Ct value (21) had been recorded in the PCR and tested with negative samples  
161 with three different Ct values (21, 27, 30). The filter papers containing the samples were placed inside  
162 identical syringes and were placed in front of the bees. There was a distance of 2 cm between the bees  
163 and the syringe outlets, which released an air puff of 20 ml in 5s.

164 We performed nine conditioning trials in which the bees were exposed to the positive samples and  
165 nine trials in which the bees were exposed to the negative samples (three trials for each sample). The  
166 bees were given the US+ when exposed to positive (infected) samples and the US- when exposed to  
167 negative (healthy) ones. The trials followed a pseudorandomized order (H-I-H-I-I-H-I-H-H-I-I-H-H-I-I-  
168 I-H) (H: Healthy, I: Infected) (Matsumoto *et al.*, 2012). The different samples were also randomised as  
169 follows (A-B-C-C-B-A-B-A-C). In addition, the experiments were mirrored, so that half of the bees

170 would be exposed to exactly the inverse of the (H-I-H-I-I-H-I-H-I-I-H-I-H-I-I-H) and (A-B-C-C-B-A-B-  
171 A-C) order. As a result, half of the bees started with a sugar reward (infected mink samples) and  
172 finished with healthy mink samples (quinine punishment) and the other half followed the reverse  
173 order. By comparing between these sequences (punishment first, reward first), we analysed which  
174 one yields the best results. Neither sequence yielded significantly better results during 1 h, while  
175 during the 24 h retention only one comparison was significantly different (Supplementary Fig. 1). This  
176 indicates that the sequence with which the samples are provided to the bees does not significantly  
177 affect their training outcome. During conditioning we recorded their learning curve and later analysed  
178 their memory retention.

### 179 Testing: Memory retention

180 In both protocols we performed memory retention tests after 1 and 24h. The number of bees differed  
181 between the training phase, the 1 h retention test and the 24 h retention test, as a result of bee  
182 mortality.

#### 183 Protocol 1

184 One hour after the end of the training, we performed a retention test to check the bees' memory by  
185 exposing them to positive and negative samples without any US and recorded whether they extended  
186 their proboscis. For the retention test we neither changed the layout used during training, nor did we  
187 remove the background negative sample odour (Old healthy sample: Old-healthy). However, we  
188 introduced novel odours of a different infected mink's swab (New infected sample: New-infected) and  
189 a different healthy mink's swab (New healthy sample: New-healthy) and an empty syringe to test the  
190 effect of the additional air pressure. The empty syringe test was also testing the bees' reaction to Old-  
191 healthy (which was present on the background). During the retention test at 24 h after the end of the  
192 training, no bees reacted to the empty syringe indicating that air pressure does not influence their  
193 reaction. At the same time, it confirmed that the bees had successfully been trained to ignore Old-



194 healthy. As a result, we did not use the empty syringe during the following days in order to avoid over-  
195 testing the bees risking a dissociation between CS and US.

## 196 Protocol 2

197 One hour after the end of the training, we tested the bees' retention capabilities. Every bee was tested  
198 multiple times with six odours in total. Two new negative and two new positive samples were used  
199 and were grouped together, during data analysis, as New-healthy and New-infected, for a more  
200 comprehensive presentation of the results. We also used the positive sample that the bees reacted to  
201 the most during conditioning (Old-infected) and the negative that they reacted to the least (Old-  
202 healthy). For the retention test we did not change the training layout and we presented the samples  
203 in a random order.

## 204 Data analysis

205 We analysed the learning rate of the bees for each protocol independently by performing generalized  
206 linear mixed models (GLMM) with a binomial distribution. In these models the bees' response (PER: 0  
207 or 1) was set as the dependent variable, while the sample (positive or negative), the conditioning  
208 round and the interaction between samples and conditioning round were fitted as fixed explanatory  
209 variables. The bees' individual identification was introduced as random intercept to account for  
210 multiple measures being made with each bee. Significance of the explanatory variables was assessed  
211 using the Wald test, with threshold for significance set to  $p < 0.05$ . Using these models, we were  
212 interested in assessing the improvement in the discrimination ability of bees between infected and  
213 healthy samples as a function of the number of conditioning rounds.

214 To assess the bee's discrimination accuracy between healthy and infected samples at 1 h and 24 h  
215 after conditioning, we fitted again a GLMM with a binomial distribution. Models were fitted for each  
216 training protocol and for each retention time (1h or 24h) independently. In these models the bees'  
217 response (PER: 0 or 1) was the dependent variable, while the type of sample (New-healthy, Old-  
218 healthy, New-infected, Old-infected) was the fixed explanatory variable and the bees' identification

219 was introduced as random intercept. For statistical comparison between sample types, we used the  
220 New-healthy sample as reference. This sample was used as reference because we considered that if  
221 the bees were to be used for diagnostic purpose they will be exposed to unknown (new) samples  
222 which they need to classify (discriminate between) as healthy or infected. Significance of the  
223 explanatory variables was assessed using the Wald test.

224 To explore the diagnostic potential of the bees and predict the diagnostic performance of the practical  
225 application of using bees for diagnosis of SARS-COV-2 we:

226 1st) Tested the association between the sample's Ct value (indicator of virus concentration in the  
227 sample) and detection rates after 1 hr of retention. Infected samples used had Cts of 21, 27 and 30.  
228 The proportions of bees reacting to each of these samples were compared using a Chi square test. For  
229 this analysis, independence was assumed and a Bonferroni correction for multiple comparisons was  
230 applied for the interpretation of significance.

231 2nd) Simulated a population of infected and non-infected samples which were individually tested by  
232 a group of bees. This simulation was done by random sampling with replacement groups of 10 bees,  
233 which would be part of a diagnostic group, from the retention tests done at 1 and 24 h. Sampling was  
234 done for positive samples or negative samples independently. A total of 300 groups of 10 bees  
235 exposed to positive samples and 300 groups exposed to negative samples were simulated. Sampling  
236 was done from the dataset with the retention results, which contained diagnostic results at individual  
237 bee level. From each sampled group the number of bees performing a correct discrimination of the  
238 sample (either positive or negative) was recorded. This number was then used to perform a Receiver  
239 Operating characteristics (ROC) analysis to identify a potential diagnostic threshold and assess the  
240 diagnostic efficacy (Sensitivity and Specificity) of the system (groups of bees).

241 All data analyses were performed using the statistical software R version 4.0.2 (R, 2013). The GLMM  
242 were fit using the library lme4 (Bates *et al.*, 2015). ROC analyses were done using the libraries pROC  
243 and ROCR (Robin *et al.*, 2011, Sing *et al.*, 2005).

## 244 Results

### 245 Protocol 1

246 We analysed the bees' learning curve during conditioning by fitting a GLMM. A significant interaction  
247 (log-odds = -0.38, standard error (SE) = 0.11,  $Z = -3.37$ ,  $P < 0.001$ ) between treatment and conditioning  
248 round was observed, which suggests a significant increase in the bee's ability to discriminate between  
249 infected and negative samples with increasing conditioning rounds (Table 1). By the end of the  
250 conditioning phase (round 7), 37 bees out of the total 56 bees (66.1%) expressed PER towards the  
251 infected sample (Old-infected) and 4 out of 56 (7.1%) towards the healthy sample (Old-Healthy) (Fig.  
252 2A).

253 Table 1. Logistic regression mixed model results analysing the bees' learning curves

| <i>Predictors</i>                       | <b>Protocol 1</b> |                   |          |          | <b>Protocol 2</b> |                   |          |          |
|-----------------------------------------|-------------------|-------------------|----------|----------|-------------------|-------------------|----------|----------|
|                                         | <i>Log-odds</i>   | <i>Std. error</i> | <i>Z</i> | <i>p</i> | <i>Log-odds</i>   | <i>Std. error</i> | <i>Z</i> | <i>p</i> |
| Intercept [Infected]                    | -1.61             | 0.36              | -4.5     | <0.001   | -1.58             | 0.22              | -7.15    | <0.001   |
| Sample [Healthy]                        | -1.06             | 0.49              | -2.13    | 0.033    | 0                 | 0.26              | 0        | 0.997    |
| Conditioning round                      | 0.31              | 0.06              | 4.86     | <0.001   | 0.36              | 0.04              | 10.22    | <0.001   |
| Sample [Healthy]*<br>Conditioning round | -0.38             | 0.11              | -3.37    | 0.001    | -0.26             | 0.05              | -5.48    | <0.001   |
| <b>Random Effects</b>                   |                   |                   |          |          |                   |                   |          |          |
| Residual SD <sup>a</sup>                | 1.81              |                   |          |          | 1.81              |                   |          |          |
| Bee id SD <sup>a</sup>                  | 1.47              |                   |          |          | 1.09              |                   |          |          |
| Number of bees                          | 56                |                   |          |          | 92                |                   |          |          |
| Observations                            | 784               |                   |          |          | 1582              |                   |          |          |
| Conditional R <sup>2</sup>              | 0.551             |                   |          |          | 0.388             |                   |          |          |

254 <sup>a</sup>SD = standard deviation

255 We tested the bees' memory retention 1 h after the conditioning phase. Every bee was exposed to  
256 three odours (samples): Old-infected (sample used for conditioning), New-infected, New-healthy.  
257 During exposure, the Old-healthy sample was always present as a background odour. Using the New-  
258 healthy sample as reference for comparisons, the GLMM analysis confirmed that most of the bees  
259 were able to discriminate (log-odds = 1.8, SE = 0.56, Z = 3.24,  $P = 0.001$ ) the Old-infected sample (32  
260 out of 56 (57.1% reacted to Old-infected)) from the New-healthy sample (17 out of 56 (30.4%) reacted  
261 to New-healthy). However, bees were not able to discriminate (log-odds = -0.13, SE = 0.52, Z = -0.26,  
262  $P = 0.796$ ) the New-infected sample (16 out 56 (28.6%)) from the New-Healthy sample (Fig. 2B).

263 Another retention test took place 24 h after the end of training, using the same odours we had used  
264 for the 1 h retention test. When analysing the reaction of the bees 24 h after conditioning, out of 56  
265 bees, 14 (25%) reacted to New-healthy sample, 23 reacted to Old-infected (41.1%) sample and 8 out  
266 of 52 (15.4%) reacted to the New-infected sample. Bees were only able to significantly discriminate  
267 between the Old-infected (Log-odds = 1.06, SE = 0.51, Z = 2.07,  $P = 0.038$ ) and the New-healthy  
268 samples (Fig. 2B).

269

## 270 Protocol 2

271 Similar to protocol 1, we analysed the bees' learning curve during conditioning using a GLMM. A  
272 significant interaction (log-odds = -0.38, SE = 0.11, Z = -3.37,  $P < 0.001$ ) between treatment and  
273 conditioning round was observed, which suggests a significant increase in the bee's discrimination  
274 ability between the positive and negative samples with the conditioning rounds (Table 1). By the end  
275 of conditioning (round 9) 67 out of 85 (78.8 %) bees expressed PER towards infected samples and 23  
276 out of 85 (27.1 %) towards healthy samples (Fig. 2C).

277 We tested the bees' memory retention 1 h after the end of the conditioning. Overall, 71 bees out of  
278 84 (84.5 %) reacted to the Old-infected sample. Bees reacted 129 times out of 168 trials (77.8%) to

279 the New-infected samples while 22 bees out of 84 (26.2%) reacted to the Old-healthy samples. Bees  
280 reacted 57 times out of 168 trials (33.9%) to New-healthy samples. The GLMM analysis (using New-  
281 healthy as reference for comparison) confirmed that bees were able to significantly discriminate  
282 (express PER) between the New-infected sample and both the Old- (log-odds = 3.02, SE = 0.42, Z =  
283 7.27,  $P < 0.001$ ) and New-infected (log-odds = 2.41, SE = 0.31, Z = 7.79,  $P < 0.001$ ) samples. No  
284 differences were observed between the bees' reaction towards the Old- (log-odds = -0.47, SE = 0.33,  
285 Z = -1.40,  $P = 0.161$ ) and New-healthy samples (Fig. 2D).

286 Another retention test was executed 24 h after the end of training, using the same odours we had  
287 used for the 1 h retention test. Overall, 45 bees out of 73 (61.6%) reacted to the Old-infected sample  
288 and 98 times out of 146 trials (67.1%) to the New-infected samples, while 33 bees out of 73 (45.2%)  
289 reacted to the Old-healthy samples and 62 times out of 146 trials (42.5%) to New-healthy samples.  
290 The GLMM analysis showed that bees were able to significantly discriminate between the New-  
291 infected and both the Old-infected (log-odds = 1.01, SE = 0.34, Z = 3.02,  $P = 0.003$ ) and New-infected  
292 (log-odds = 1.31, SE = 0.28, Z = 4.59,  $P < 0.001$ ) samples. The bees' reaction to the Old- and New-  
293 healthy samples did not differ significantly (log-odds = 0.14, SE = 0.33, Z = 0.44,  $P = 0.658$ ) (Fig. 2D).

294

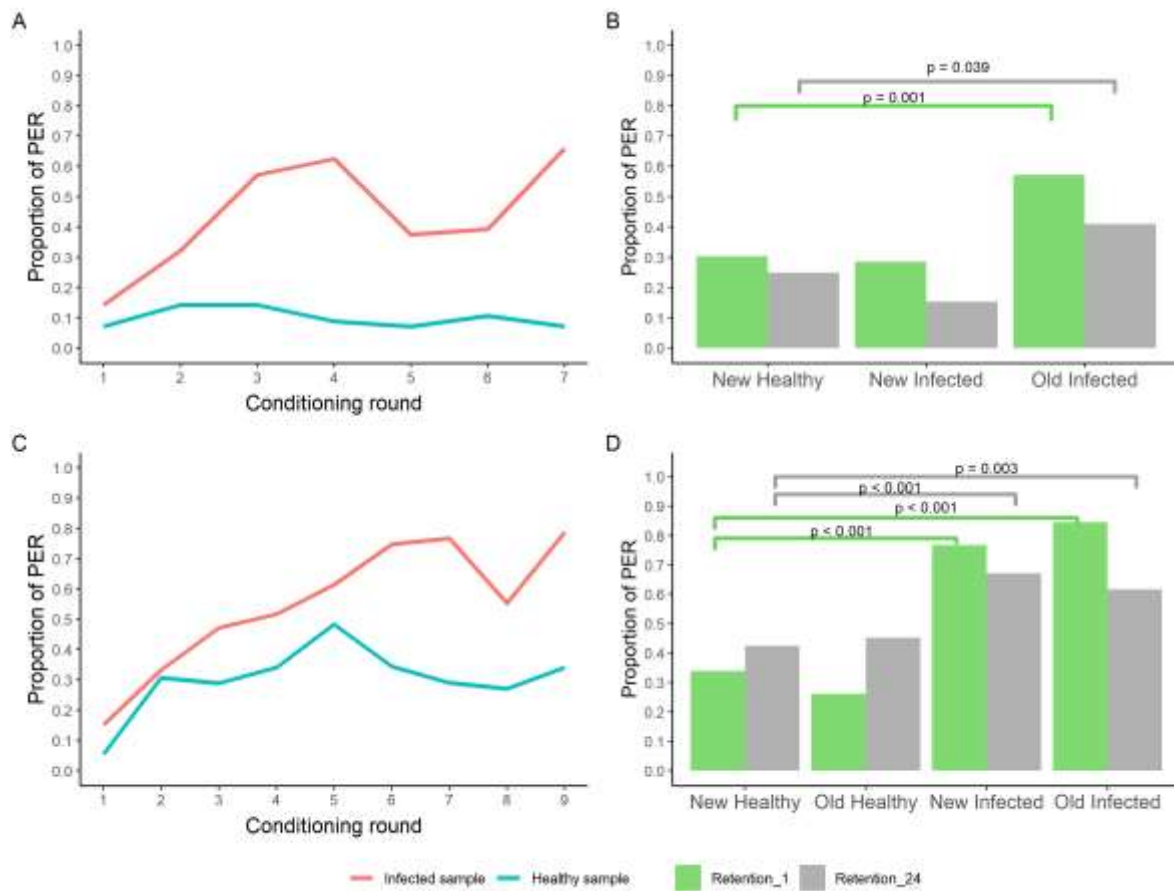

295

296 **Figure 2. Learning and memory retention of the bees.** Panels A and B show the learning curve  
297 (n = 56 bees) and memory retention (n = 56 bees) of bees subjected to protocol 1. Panel C and  
298 D show the learning curve (n = 92 bees) and memory retention (n = 56 bees) of bees subjected  
299 to protocol 2. For Panel A and C (learning curves), the Y-axis shows the proportion of bees  
300 expressing PER towards infected (red) and healthy (blue) samples in each conditioning round  
301 while the X-axis indicates the conditioning round. For panels C and D (memory retention, the  
302 Y-axes show the proportion of bees expressing PER and the X-axes show the different types of  
303 samples that the bees were exposed to 1 h (green columns) and 24 h (grey columns) after the  
304 conditioning training ended. Segments and corresponding *P* values indicate comparisons where  
305 significant. The sample type New Healthy was used as reference for statistical comparison.

306

## 307 Bees as a diagnostic tool

### 308 Association between Ct values and the bees' retention ability

309 We compared the proportion of bees showing PER depending on the Ct values of the infected samples.  
310 After being trained on a sample with a Ct =21, a total of 42 bees were exposed to samples with three  
311 different Ct values (Ct: 21, 27 or 30): 35 (83.3%) bees showed PER for the sample with a Ct = 21, 40  
312 (95.2%) showed the samples with Ct = 27 and 31 (73.8%). The samples used for training were those  
313 with a Ct =21, hence we used this group as reference for comparison. No significant differences were  
314 observed between either the Ct = 21 group and the Ct = 27 group ( $\chi^2 = 0.63$ ,  $df = 1$ ,  $P = 0.16$ ,  $P_{adjusted}$   
315  $= 0.475$ ) or Ct =21 and Ct = 30 ( $\chi^2 = 0.63$ ,  $df = 1$ ,  $P = 0.42$ ,  $P_{adjusted} = 1$ ) groups, indicating that bees  
316 trained with samples having a high virus concentration (a low Ct value) are still able to recognize  
317 samples with lower virus concentrations (high Ct value).

### 318 Predicted performance when using bees as a diagnostic tool

319 The distribution of diagnostic results when testing healthy and infected samples in a simulated  
320 scenario in which a group of 10 trained bees would be used to test a sample, is shown in Fig. 5a. The  
321 ROC analysis on the simulated data resulted in an estimated area under the curve (AUC) (Fig. 5b) equal  
322 to 0.96 (95% confidence interval (CI): 0.95 – 0.98), which indicates that using groups of trained bees  
323 could be a diagnostic tool with significant discrimination accuracy ( $AUC > 0.5$ ,  $p < 0.001$ ). Using a  
324 response of 6 or more (out of 10) bees showing PER per test to classify a sample as positive would  
325 maximize the diagnostic performance of this tool. The resulting potential sensitivity (true positive  
326 rate), which is the probability that the test will correctly classify a truly infected sample as positive,  
327 would be 0.92 (95% CI: 0.89 – 0.95) and the potential specificity (true negative rate), which is the  
328 probability that the test will correctly classify a healthy sample as negative, 0.86 (95% CI: 0.82 – 0.90)  
329 (Fig. 3).

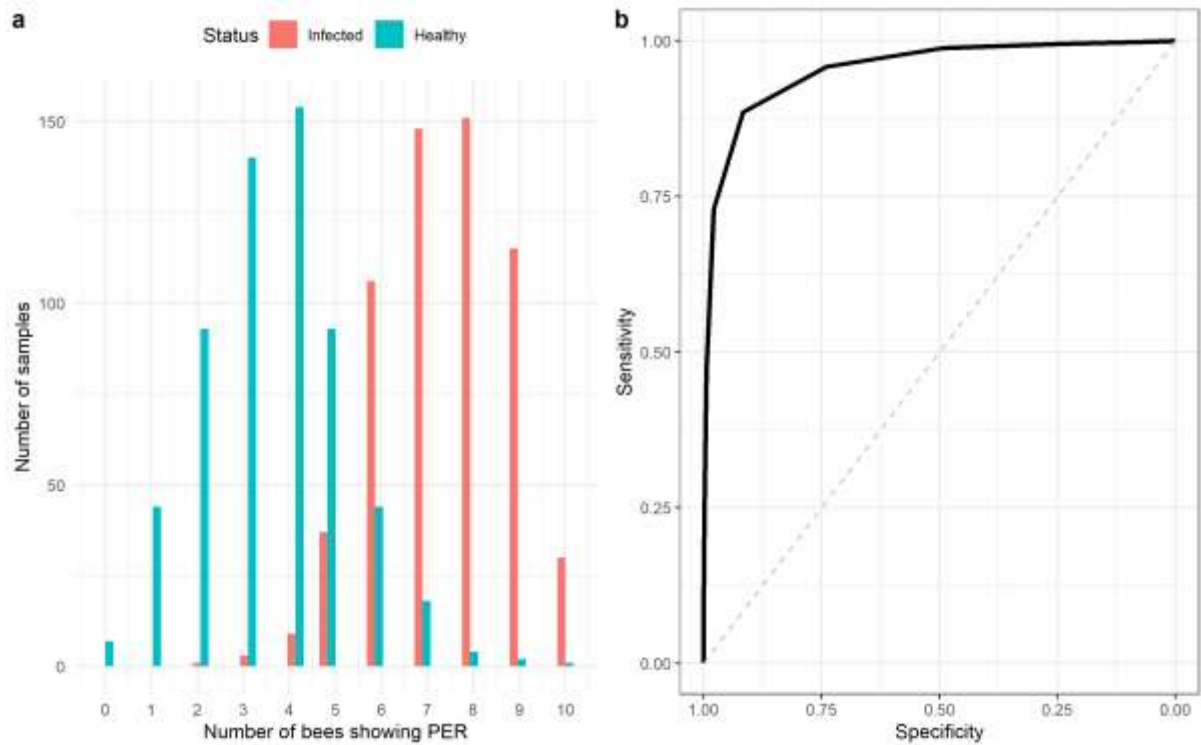

330

331 **Figure 3. Simulated diagnostic potential of trained bees.** a) Distribution of simulated  
332 diagnostic results where a group of 10 bees is used as diagnostic tool per sample. The X axis  
333 indicates the number of bees (out of 10) per test showing PER. b) Receiver operating  
334 characteristic curve (ROC) of the predicted diagnostic performance.

## 335 Discussion

336 The objective of this study was to investigate whether bees can be trained to detect SARS-CoV-2  
337 infected samples. Our data show that the differences in odour between SARS-CoV-2 infected samples  
338 and uninfected samples can be recognised by honeybees. The bees discriminated between samples  
339 taken from healthy and SARS-CoV2 infected individuals. Although the bees' discrimination ability  
340 decreases between 1 h and 24 h post conditioning, we observed that they were nevertheless still able  
341 to significantly discriminate between new infected and healthy samples after one day post-  
342 conditioning. Moreover, their ability to recognise a positive sample was not compromised by the  
343 samples' viral load (expressed in Ct values), since bees recognised samples with higher Ct values (lower  
344 viral load) equally well as they did with samples with low Ct values used for conditioning. By



345 performing simulations of the potential clinical application of the bees as a diagnostic tool, we predict  
346 that bees could be effective for diagnostics with a predicted sensitivity around 92% and specificity  
347 around 86%.

348 With our protocol 1, we followed a similar procedure as Sutherland *et al.* (2010). In our study, more  
349 bees learned to recognize the rewarded odour (current study: 66.1%, Sutherland *et al.*: 30-40%).  
350 Sutherland *et al.* (2010) reported that one hour after training, 20% of the trained bees were no longer  
351 able to discriminate, which is similar to the reduction in percentage we observed. Sutherland *et al.*  
352 (2010) did not perform any test with novel infected and healthy samples, and we did not find literature  
353 where a similar approach to ours was taken. In protocol 2, we followed a similar procedure as Wright  
354 *et al.* (2010). The bees in the present experiment learned slightly less well than in their experiment  
355 (current study: 78.8%, Wright *et al.*: >85%). Assuming that this difference is significant, we could  
356 speculate that this is a result of samples being more difficult to discriminate either by being more  
357 perceptually similar or less concentrated. Wright *et al.* (2010) did not test the 1 h memory of the bees  
358 but only their memory after 10 min. Their results were similar to ours at 1 h (current study: 83.5%,  
359 Wright *et al.*: 80%).

360 Protocol 1 was shorter than protocol 2 making it a faster way to condition bees, while it also required  
361 no aversive US and less samples during training. However, protocol 1 did not result in the bees being  
362 able to discriminate between the novel infected and novel healthy samples. That indicates that they  
363 were not able to generalize between infected samples and to associate VOCs that commonly occur in  
364 infected samples with a reward. The bees correctly discriminated between the old infected and novel  
365 healthy samples which provided confirmation of the ability of the bees to recognise specific VOCs, but  
366 not to generalize over different infected samples. In contrast to protocol 1, protocol 2 resulted in a  
367 better discrimination ability between novel infected and healthy samples at both 1 h and 24 h  
368 retention, indicating that this protocol is more efficient for training bees for SARS-CoV-2 diagnostic  
369 testing. The differences between the two protocols outputs may be the consequence of the bees'

370 tendency to increase their attention during a learning task when faced with a potentially negative  
371 outcome (Avarguès-Weber *et al.*, 2010; Chittka *et al.*, 2003). In addition, both protocols differed in the  
372 number of conditioning rounds which could yield in a better memory. Finally, different samples were  
373 used in the conditioning phase of protocol 2, thus promoting generalization of response based on the  
374 common properties of all infected samples rather than on individual differences.

375 Conditioning of bees to SARS-CoV-2 derived VOCs could thus be further improved by focusing on the  
376 protocol that best worked in this study and add other elements that can make conditioning even more  
377 effective. Such an addition could be an extra training few hours after the original one or a different  
378 number of trials and alternative US. In our experiments we used appetitive-aversive conditioning due  
379 to the complexity and similarity of the odours the bees were trained for. In some cases, especially  
380 when bees are trained to fewer complex odours, the addition of a negative reinforcement can lead to  
381 lower discrimination and higher false positives (Aguar *et al.*, 2018).

382 Our results show that using single bees for diagnosis would have limited sensitivity and specificity,  
383 since the retention tests for protocol 2 showed that at 24 h post conditioning 67% of the bees correctly  
384 identified the infected sample (sensitivity) and 58% the healthy sample (specificity). A possible  
385 approach to improve diagnostic performance would be the use of multiple bees probing the same  
386 sample in parallel. In this case, diagnosis would be based on a defined number of bees (known as  
387 diagnostic threshold) reacting (expressing PER) to the sample being tested. We assessed such an  
388 approach by performing simulations where groups of 10 bees would be used to test a sample and  
389 identified that at least six bees would have to show PER for the sample to be considered positive. By  
390 taking this approach, the potential sensitivity of the test was predicted to be around 92% and the  
391 specificity around 86%. The current standard for laboratory diagnosis of active SARS-CoV-2 infection  
392 is the detection of viral RNA from respiratory specimens by real-time, reverse transcription  
393 polymerase chain reaction (qRT-PCR). Our predicted results on accuracy are comparable to the  
394 diagnostic performance of point of care (POC) tests such as RT-LAMP tests (without RNA extraction)

395 and rapid antigen tests. These tests showed sensitivities higher than 70% for samples with Ct<33 or  
396 taken within the first week of symptom onset and specificities higher than 90% (Fowler *et al.*2021,  
397 Krüttgen *et al* 2021, Dinnes *et al.*, 2021). In general, these POC tests require more than 10 minutes to  
398 produce a test result, whereas bees only require a few seconds to express PER (< 5 s). Dogs can also  
399 be trained to detect SARS-CoV-2 and provide results very quickly. However, dogs require much more  
400 time and resources to be trained compared with bees, and their sensitivity is lower than the honeybee  
401 test (dogs: sensitivity ranges from 65-82.6%; Eskandari *et al.*, 2021; Jendryn *et al.*, 2020). Moreover,  
402 dogs may be infected with SARS-CoV-2 whereas bees are not sensitive to the virus. In addition, bees  
403 can be employed in remote areas where microbiological laboratory facilities are not available. As such,  
404 it can be concluded that the honeybee test is a suitable alternative especially in situations where  
405 resources and laboratory equipment are scarce. This establishes the bee diagnostic test as an  
406 attractive monitoring method for developing countries and remote livestock communities, thanks to  
407 its low requirements and good diagnostic efficacy.

408 Our results suggest that honeybees could be used for SARS-CoV-2 diagnosis and could potentially be  
409 applied for diagnosis of other infectious diseases. Further research is needed in order to define the  
410 duration of their memory. It is clear that their memory is weaker 24 h after the experiments compared  
411 to 1 h after the training, which might be the result of complexity and similarity of the odours. We need  
412 to identify the crucial moment in time, in which their memory retention is compromised and further  
413 assess the performance with a wider range of Ct values. Here we only tested samples with a maximum  
414 Ct of 30 and given the limited number of samples tested, we cannot assume that the performance  
415 would be similar with higher Ct values. In addition, a formal diagnostic validation study is necessary to  
416 properly validate the diagnostic approach applied under field conditions and confirm the diagnostic  
417 potential predicted in this study. The diagnostic test proposed in this study has certain weaknesses  
418 that need to be improved. The need to use multiple bees in parallel along with the laborious process  
419 of conditioning bees manually can make the preparation of the test inefficient. In addition, the bees  
420 can only be used for testing a few samples before an extension of their memory would be observed

421 due to the absence of reward during the tests. The bees will thus have to go through a few numbers  
422 of reactivating conditioning rounds before being again operational for testing.

## 423 Conclusion

424 Our results indicate that the VOC profile differs between healthy and SARS-CoV2 infected minks and  
425 that honeybees can recognise these differences and discriminate between them. This performance  
426 suggests the presence of specific biomarkers, which could be explored by performing a Gas  
427 Chromatography/ Mass Spectrometry (GC/MS) analysis. Our experiments demonstrate that bees can  
428 effectively detect the presence of an infection in samples of an extensive range of Ct values. Once  
429 improved, a diagnostic test utilizing the learning abilities of honeybees might thus provide an  
430 important addition to the current monitoring system of zoonotic diseases in remote livestock farming  
431 systems.

## 432 Acknowledgements

433 We thank Bregtje Smit for outstanding laboratory technical assistance. Dr. Hans Smid from the  
434 Laboratory of Entomology of Wageningen University, for his valuable insights and guidance, Saptarshi  
435 Mukhopadhyay from InsectSense B.V. and Edmund Taylor for their assistance and support throughout  
436 the project. This study was supported by the Wageningen University and Research KB37 research  
437 program and by funding from the European Union's Horizon 2020 Research and Innovation  
438 programme under grant agreement No 773830: One Health European Joint Programme."

## 439 Competing interests

440 We declare no competing interests.

## 441 References

- 442 Aguiar, J. M. R. B. V. *et al.* (2018) 'Can honey bees discriminate between floral-fragrance isomers?',  
443 *Journal of Experimental Biology*, 221(14). doi: 10.1242/jeb.180844.
- 444 Avarguès-Weber, A., de Brito Sanchez, M.G., Giurfa, M. and Dyer, A.G., 2010. Aversive reinforcement  
445 improves visual discrimination learning in free-flying honeybees. *PLoS One*, 5(10), p.e15370.
- 446 Bates, D., Mächler, M., Bolker, B. and Walker, S., 2014. Fitting linear mixed-effects models using  
447 lme4. *arXiv preprint arXiv:1406.5823*.
- 448 Buljubasic, F. and Buchbauer, G. (2015) 'The scent of human diseases: A review on specific volatile  
449 organic compounds as diagnostic biomarkers', *Flavour and Fragrance Journal*, 30(1), pp. 5–25. doi:  
450 10.1002/ffj.3219.
- 451 Chittka, L., Dyer, A.G., Bock, F. and Dornhaus, A., 2003. Bees trade off foraging speed for  
452 accuracy. *Nature*, 424(6947), pp.388-388.
- 453 Corman VM, Landt O, Kaiser M, Molenkamp R, Meijer A, Chu DK, *et al.* Detection of 2019 novel  
454 coronavirus (2019-nCoV) by real-time RT-PCR. *Euro Surveill.* 2020;25(3):2000045. 10.2807/1560-  
455 7917.ES.2020.25.3.2000045
- 456 Dinnes, Jacqueline, *et al.* "Rapid, point-of-care antigen and molecular-based tests for diagnosis of  
457 SARS-CoV-2 infection." *Cochrane Database of Systematic Reviews* 3 (2021).
- 458 Eskandari, E., Marzaleh, M.A., Roudgari, H., Farahani, R.H., Nezami-Asl, A., Laripour, R., Aliyazdi, H.,  
459 Moghaddam, A.D., Zibaseresht, R., Akbarialiabad, H. and Zoshk, M.Y., 2021. Sniffer dogs as a  
460 screening/diagnostic tool for COVID-19: a proof of concept study. *BMC infectious diseases*, 21(1), pp.1-  
461 8.
- 462 European Centre for Disease Prevention and Control. COVID-19 testing sequences and objectives. 15  
463 September 2020. ECDC: Stockholm; 2020.
- 464 Fitzgerald, J. E. *et al.* (2017) 'Artificial Nose Technology: Status and Prospects in Diagnostics', *Trends in*  
465 *Biotechnology*. Elsevier Ltd, 35(1), pp. 33–42. doi: 10.1016/j.tibtech.2016.08.005.
- 466 Fowler, V.L., Armson, B., Gonzales, J.L., Wise, E.L., Howson, E.L., Vincent-Mistiaen, Z., Fouch, S.,  
467 Maltby, C.J., Grippon, S., Munro, S. and Jones, L., 2021. A highly effective reverse-transcription loop-  
468 mediated isothermal amplification (RT-LAMP) assay for the rapid detection of SARS-CoV-2  
469 infection. *Journal of infection*, 82(1), pp.117-125.
- 470 Gronenberg, W. *et al.* (2014) 'Honeybees (*Apis mellifera*) learn to discriminate the smell of organic  
471 compounds from their respective deuterated isotopomers', *Proceedings of the Royal Society B:*  
472 *Biological Sciences*, 281(1778). doi: 10.1098/rspb.2013.3089.
- 473 Hadagali, M. D. and Suan, C. L. (2017) 'Advancement of sensitive sniffer bee technology', *TrAC - Trends*  
474 *in Analytical Chemistry*. Elsevier Ltd, 97, pp. 153–158. doi: 10.1016/j.trac.2017.09.006.
- 475 Jendry, P. *et al.* (2020) 'Scent dog identification of samples from COVID-19 patients - A pilot study',  
476 *BMC Infectious Diseases*. BMC Infectious Diseases, 20(1), pp. 1–7. doi: 10.1186/s12879-020-05281-3.
- 477 Kanazawa, M. *et al.* (2005) 'Classical conditioned response of rectosigmoid motility and regional  
478 cerebral activity in humans', *Neurogastroenterology and Motility*, 17(5), pp. 705–713. doi:  
479 10.1111/j.1365-2982.2005.00691.x.
- 480 Krüttgen, A., Cornelissen, C.G., Dreher, M., Hornef, M.W., Imöhl, M. and Kleines, M., 2021. Comparison  
481 of the SARS-CoV-2 Rapid antigen test to the real star Sars-CoV-2 RT PCR kit. *Journal of virological*

482 *methods*, 288, p.114024.

483 Matsumoto, Y. *et al.* (2010) 'Revisiting olfactory classical conditioning of the proboscis extension  
484 response in honey bees: A step toward standardized procedures', *Journal of Neuroscience Methods*.  
485 Elsevier B.V., 211(1), pp. 159–167. doi: 10.1016/j.jneumeth.2012.08.018.

486 Olsson, M. J. *et al.* (2014) 'The Scent of Disease: Human Body Odor Contains an Early Chemosensory  
487 Cue of Sickness', *Psychological Science*, 25(3), pp. 817–823. doi: 10.1177/0956797613515681.

488 Oreshkova, N., Molenaar, R.J., Vreman, S., Harders, F., Munnink, B.B.O., Hakze-van Der Honing, R.W.,  
489 Gerhards, N., Tolsma, P., Bouwstra, R., Sikkema, R.S. and Tacken, M.G., 2020. SARS-CoV-2 infection in  
490 farmed minks, the Netherlands, April and May 2020. *Eurosurveillance*, 25(23), p.2001005.

491 Pavlov, I. P. (1927) 'Conditioned reflexes: An investigation of the physiological activity of the cerebral  
492 cortex', *Annals of neurosciences*, 17(3). doi: 10.5214/ans.0972-7531.1017309.

493 Probert, C.S., Khalid, T., Ahmed, I., Johnson, E., Smith, S. and Ratcliffe, N.M., 2009. Volatile organic  
494 compounds as diagnostic biomarkers in gastrointestinal and liver diseases. *Journal of Gastrointestinal  
495 and Liver Disease*, 18(3).

496 R.C., Team, 2013. R: A language and environment for statistical computing.

497 Robin, X., Turck, N., Hainard, A., Tiberti, N., Lisacek, F., Sanchez, J.C. and Müller, M., 2011. pROC: an  
498 open-source package for R and S+ to analyze and compare ROC curves. *BMC bioinformatics*, 12(1),  
499 pp.1-8.

500 Sethi, S., Nanda, R. and Chakraborty, T. (2013) 'Clinical application of volatile organic compound  
501 analysis for detecting infectious diseases', *Clinical Microbiology Reviews*, 26(3), pp. 462–475. doi:  
502 10.1128/CMR.00020-13.

503 Shirasu, M. and Touhara, K. (2011) 'The scent of disease: Volatile organic compounds of the human  
504 body related to disease and disorder', *Journal of Biochemistry*, 150(3), pp. 257–266. doi:  
505 10.1093/jb/mvr090.

506 Suckling, D. M. and Sagar, R. L. (2011) 'Honeybees *Apis mellifera* can detect the scent of  
507 *Mycobacterium tuberculosis*', *Tuberculosis*. Elsevier Ltd, 91(4), pp. 327–328. doi:  
508 10.1016/j.tube.2011.04.008.

509 Sutherland, A. M. *et al.* (2010) 'Classical conditioning of domestic honeybees to olfactory stimuli  
510 associated with grapevine powdery mildew infections', pp. 90–92.

511 Sing, T., Sander, O., Beerenwinkel, N. and Lengauer, T., 2005. ROCr: visualizing classifier performance  
512 in R. *Bioinformatics*, 21(20), pp.3940-3941.

513 Takeda, K., 1961. Classical conditioned response in the honey bee. *Journal of Insect Physiology*, 6(3),  
514 pp.168-179.

515 Trabue, S. *et al.* (2010) 'Speciation of volatile organic compounds from poultry production',  
516 *Atmospheric Environment*, 44(29), pp. 3538–3546. doi: 10.1016/j.atmosenv.2010.06.009.

517 Wells, C.R., Townsend, J.P., Pandey, A. *et al.* Optimal COVID-19 quarantine and testing sequences. *Nat*  
518 *Commun* 12, 356 (2021). <https://doi.org/10.1038/s41467-020-20742-8>

519 Wilson, A. D. (2018) 'Applications of electronic-nose technologies for noninvasive early detection of  
520 plant, animal and human diseases', *Chemosensors*, 6(4), pp. 1–36. doi:  
521 10.3390/chemosensors6040045.

522 Wright, G. A. *et al.* (2010) 'Parallel reinforcement pathways for conditioned food aversions in the

523 honeybee', *Current Biology*, 20(24), pp. 2234–2240. doi: 10.1016/j.cub.2010.11.040.
